# Supplementary material for: An ultrasensitive electrochemical immunosensor based on the synergistic effect of quaternary Cu2SnZnS4 NCs and cyclodextrin-functionalized graphene
Source: Royal Society of Chemistry journal article supplement (doi:10.1039/c6an02538b), 2017-01-01
Supplement: c6an02538b1.pdf [file c6an02538b1.pdf]

## Supplementary information

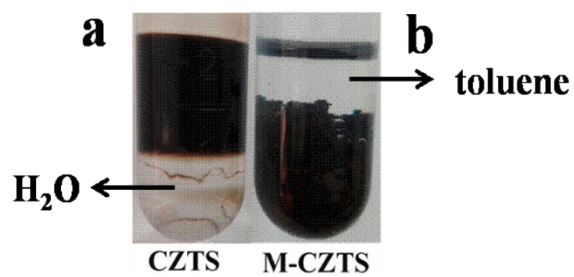

Figure S1. Photographs of the CZTS NCs before (a) and after (b) the ligand exchange process.

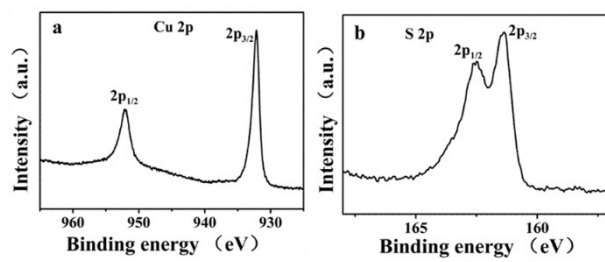

Figure S2. XPS spectra of Cu<sub>2</sub>S nanocrystals.

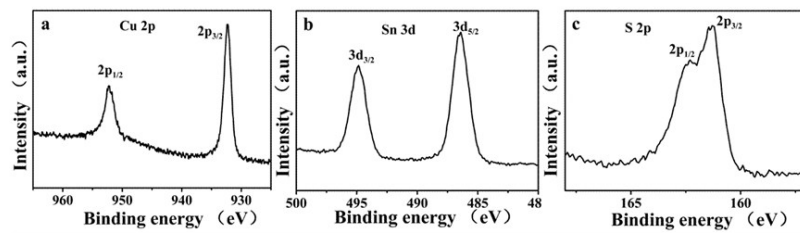

Figure S3. XPS spectra of  $\text{Cu}_2\text{SnS}_3$  nanocrystals.
